# Supplementary material
Source: PubMed Central journal article supplement (PMC8734163)
Supplement: 12866_2021_2427_MOESM1_ESM.pdf [file 12866_2021_2427_MOESM1_ESM.pdf]

**Table S1.** Primers used for O antigen serotyping.

|     | <b>Primer Sequence</b>       | <b>Product</b>                      | <b>Size (bp)</b> |
|-----|------------------------------|-------------------------------------|------------------|
| 1A  | TGCTCTTTGGCTTCTTGATTCTTG     | Primer 1, O1-specific product       | 396              |
| 1B  | TCTACACCGCCAGAACTACCTAGCT    | Primer 2, O1-specific product       |                  |
| 2A  | GCGGCTTTTATCAACCGTGTGCGCA    | Primer 1, O2, O5, O16, O18, and O20 | 1217             |
| 2B  | TCCCTTGGCACACTGGAAGGACAT     | Primer 2, O2, O5, O16, O18, and O20 |                  |
| 3A  | GCGTCGTTGTTCAAGTTTGGACGTG    | Primer 1, O3 and O15                | 406              |
| 3B  | TCTGGAAAACCTGAGCAGCCGTCC     | Primer 2, O3 and O15                |                  |
| 4A  | GCTAATAACGGAAGGACCTTGAAT     | Primer 1, O4-specific product       | 551              |
| 4B  | TAAAAGCTCGGCGTAACGCTTATG     | Primer 2, O4-specific product       |                  |
| 5A  | ATTGGCTAGTGCTACACGAGTGCA     | Primer 1, O6-specific product       | 380              |
| 5B  | CGAATTAGCTTGCTCTTCAGGAAAG    | Primer 2, O6-specific product       |                  |
| 6A  | GGAATGTCGCTCTCGTTTCAAGTG     | Primer 1, O7 and O8                 | 451              |
| 6B  | CTAGTATTCATCAACTGCTGTAC      | Primer 2, O7 and O8                 |                  |
| 8A  | CAGCAGGGAATATCGCTTGAACAGT    | Primer 1, O10 and O19               | 547              |
| 8B  | CTATAATGCATTAGCGACTCACCG     | Primer 2, O10 and O19               |                  |
| 9A  | TACTTCACCCATAGCTAGCGCTCTA    | Primer 1, O11 and O17               | 452              |
| 9B  | TTCTCTCTCAACTTAACCGTGGCC     | Primer 2, O11 and O17               |                  |
| 10A | CTATTCAGTCGATGATCCTTGTG      | Primer 1, O13 and O14               | 488              |
| 10B | AGCAGTTAGCAAATTTCACTCTCCAGCC | Primer 2, O13 and O14               |                  |

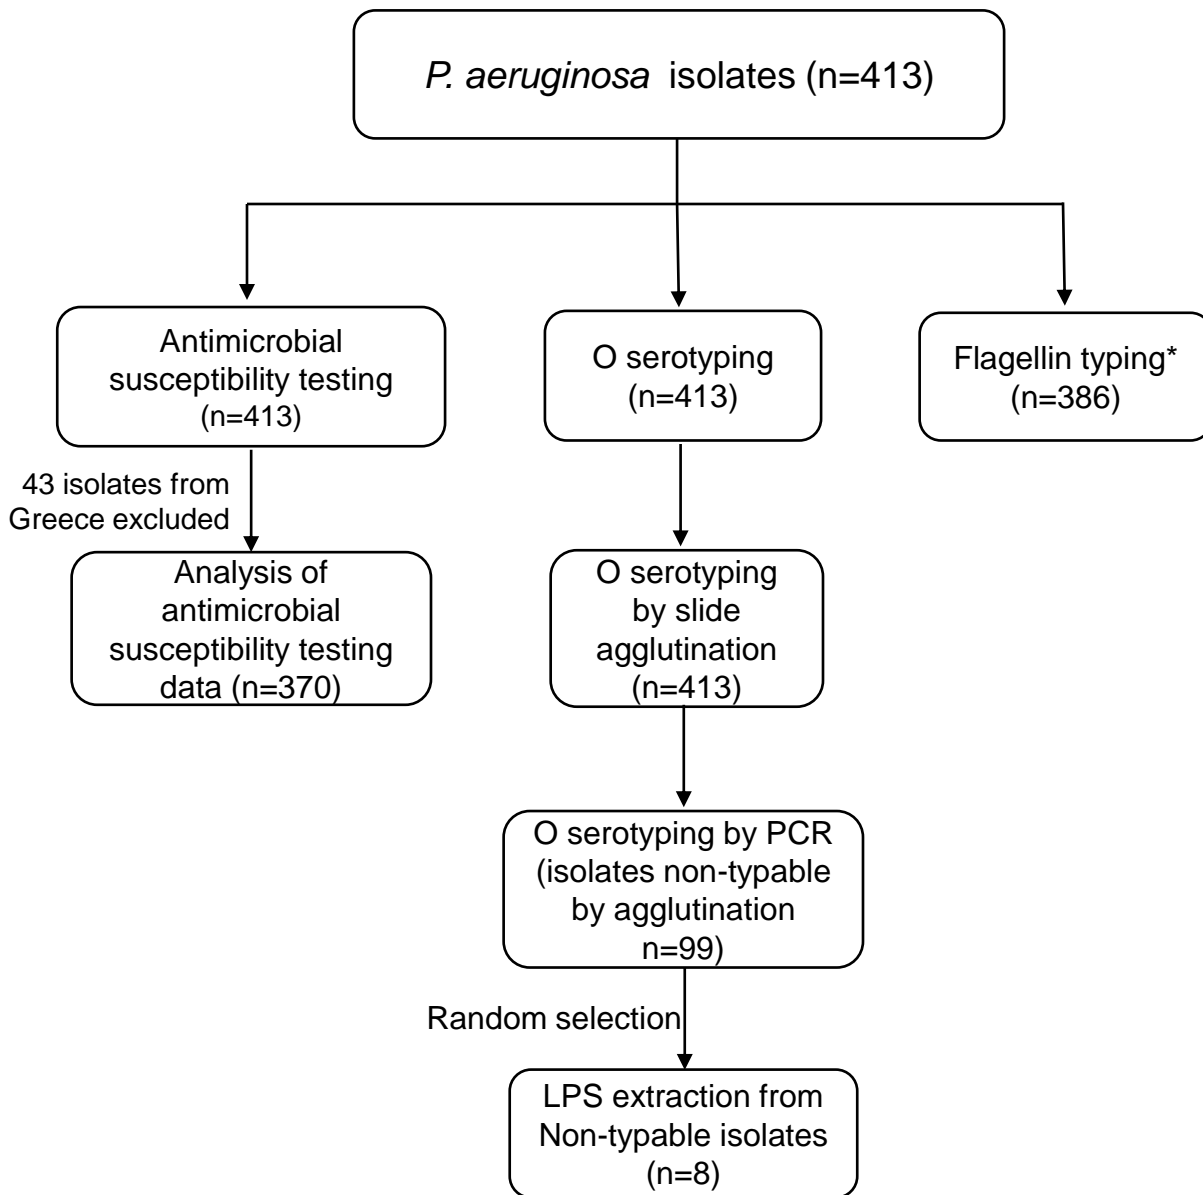

**Figure S1.** The number of *P. aeruginosa* isolates tested by each method. \*Flagellin typing was not performed on 27 isolates from Duke University due to logistic constraints.

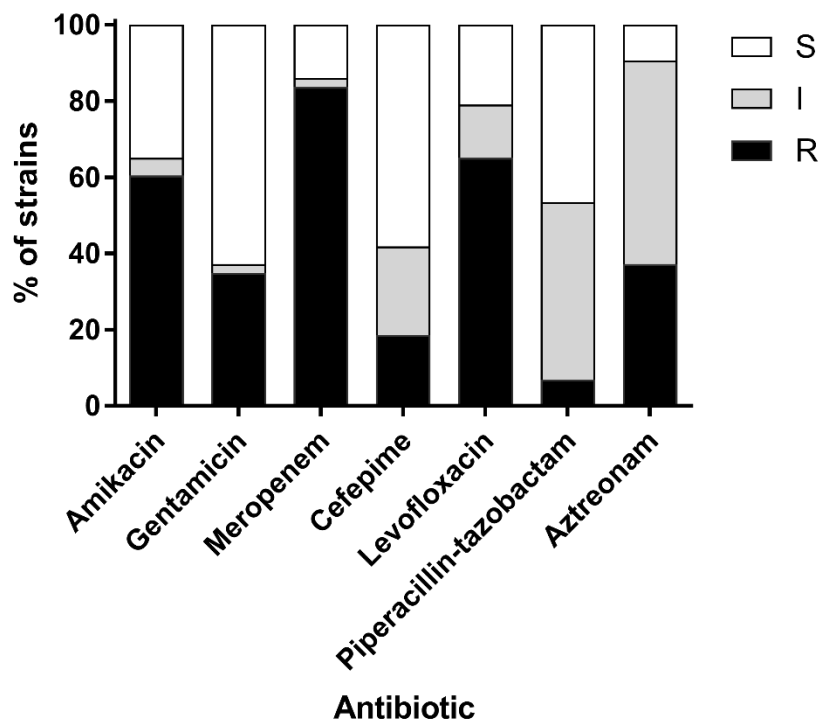

**Figure S2.** Antibiotic resistance of isolates from Greece.

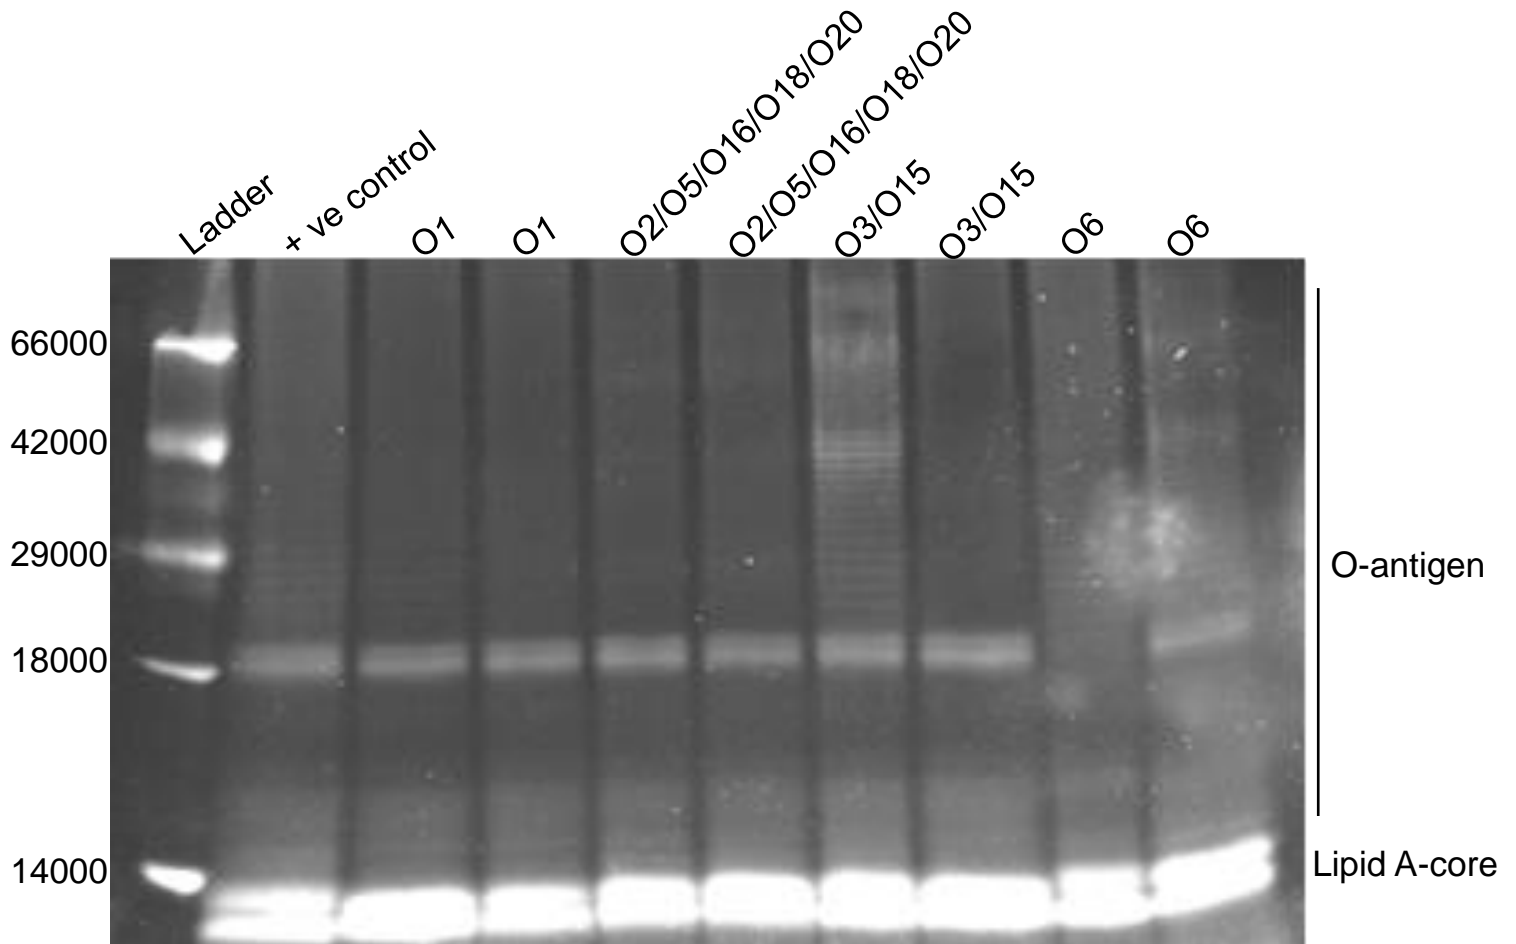

**Figure S3.** The O-antigen profiles of representative non-typable *P. aeruginosa* isolates determined by SDS-PAGE. LPS from eight non-typable *P. aeruginosa* strains were extracted and separated on a 4-12% Bis-Tris SDS-polyacrylamide gel and stained with Pro-Q Emerald 300 according to manufacturer's instructions. CandyCane glycoprotein molecular weight standard (ladder), *P. aeruginosa* strain PAK (+ve control).
